# Supplementary material for: Analysis of Grapevine rupestris stem pitting-associated virus in Slovakia Reveals Differences in Intra-Host Population Diversity and Naturally Occurring Recombination Events
Source: PubMed Central journal article supplement — Plant Pathol J. 2017 Feb 1;33(1):34–42. doi: 10.5423/PPJ.OA.07.2016.0158 (PMC5291396; doi:10.5423/ppj.oa.07.2016.0158), 2017-02-01
Supplement: ppj-33-034_suppl.pdf [file ppj-33-034_suppl.pdf]

## SUPPLEMENTARY MATERIAL

Supplementary Fig. 1. Split decomposition network of the GRSPaV population for which the complete genome sequences are available.

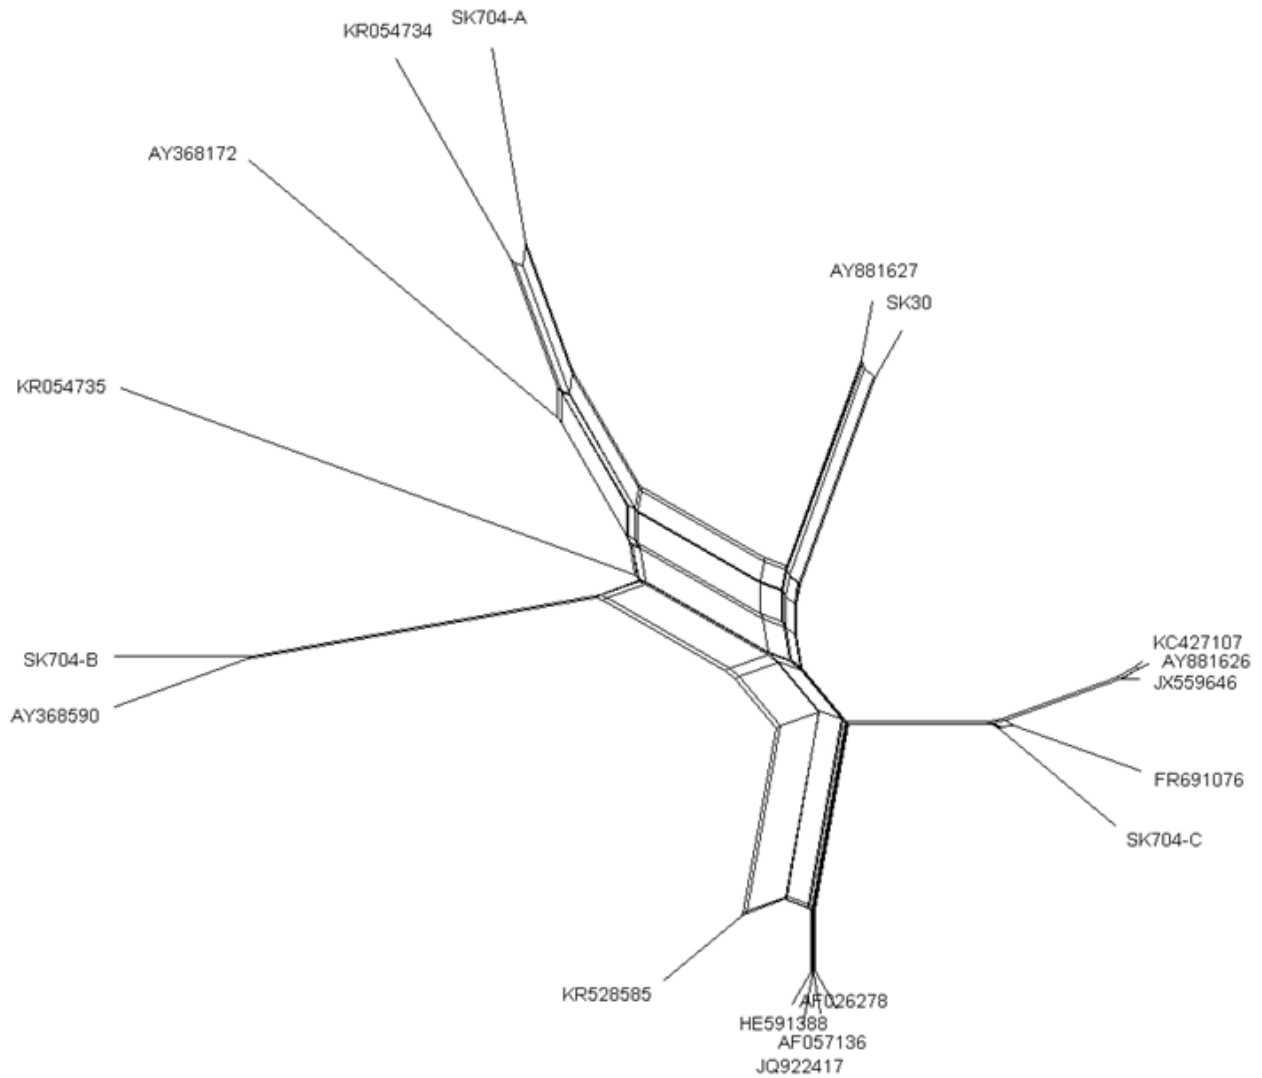

Supplementary Table 1. Primers used for PCR amplification and sequencing of the overlapping fragments covering the SK30 genome

| primer                  | orientation | Sequence (5'→ 3')    | primer position |
|-------------------------|-------------|----------------------|-----------------|
| GRSPaV-1-s <sup>1</sup> | +           | GATAAACATAACAACAGAAT | 1-20            |
| GRSPaV-1357-as          | -           | TGCTCAAAGAAATCAGGAGT | 1357-1376       |
| GRSPaV-1303-s           | +           | TCATTTGTGTACTCACTTGA | 1303-1322       |
| GRSPaV-2744-as          | -           | TCGGTCAAGCTTTTCATGAT | 2744-2763       |
| GRSPaV-2633-s           | +           | TCCATGGGGTTTCCAATTGT | 2633-2652       |
| GRSPaV-4123-as          | -           | CCAGCCCCAAATGTACCAAG | 4123-4142       |
| GRSPaV-4027-s           | +           | ACTGGCGTTATAAGTGATGA | 4027-4046       |
| GRSPaV-5638-as          | -           | ACATCTAACAGCCAATCCCT | 5638-5657       |
| GRSPaV-5443-s           | +           | AAGCCTCAGGTTGAAGCTGC | 5443-5462       |
| GRSPaV-7244-as          | -           | GCAGGCTGCTGAAAAGGCAT | 7244-7263       |
| Rup_6288F               | +           | CCACATTYTGYGGATGGTG  | 6269-6287       |
| Rup_6948R               | -           | TTAGCACCAAACCTRCARG  | 6929-6947       |
| GRSPaV-6664-s           | +           | CCTGGTAGTGGTAAAAGTAG | 6664-6683       |
| GRSPaV-8436-as          | -           | GCCATAGCTTGTCTGAGCAC | 8436-8455       |
| GRSPaV-8342-s           | +           | CACAGATGAGAGTGCGCTTG | 8342-8361       |
| Oligo dT                | -           | T <sub>21</sub> V    | poly A tail     |

<sup>1</sup>As the sequence of the first 33 nucleotides of the available full GRSPaV sequences is nearly identical, a primer corresponding to the first 20 nucleotides of this conserved region was used as the 5' primer for cDNA amplification of this part of genome

Supplementary Table 2. Primers used for (a) PCR amplification and sequencing of the 5' and 3' sequence of SK704 variants, (B) amplification of the most divergent part of the GRSPaV genome of SK704 variants

| primer     | orientation | Sequence (5' → 3')    | primer position |
|------------|-------------|-----------------------|-----------------|
| (a)        |             |                       |                 |
| GRSPaV-1-s | +           | GATAAACATAACAACAGAAT  | 1-20            |
| Rup461R-1  | -           | CCATACCTGCTAACATCACG  | 442-461         |
| Rup230R-2  | -           | GATATTAGCCTTTCCTTGAC  | 210-230         |
| Rup1205R-3 | -           | TCAATAGGGAACCACTCCGC  | 1185-1204       |
| Rup8349F   | +           | AGATGAGAGYGCGCTTGAAC  | 8345-8364       |
| Rup8551F   | +           | CTGATAGTTGAAGCAATGC   | 8552-8570       |
| Oligo dT   | -           | T <sub>21</sub> V     | poly A tail     |
| (b)        |             |                       |                 |
| A-Rup1655F | +           | AGTGTAAGAATGGCTCTTGGG | 1654-1674       |
| A-Rup2226R | -           | GGATAAGGCACCTATGGCC   | 2205-2223       |
| B-Rup1742F | +           | TCATACAGGTCAAGGCTGGC  | 1741-1760       |
| B-Rup2243R | -           | ACCCAATCAAAGGGCTTTGG  | 2221-2240       |
| C-Rup1651F | +           | TCAAAGGTTAAGGCTGCGC   | 1651-1669       |
| C-Rup2239R | -           | AATTGAGATCCTCCGGTAGGA | 2216-2236       |
